# Estrogen Blocks Parathyroid Hormone (PTH)-Stimulated Osteoclast-Like Cell Formation by Selectively Affecting PTH-Responsive Cyclic Adenosine Monophosphate Pathway\*

HIROSHI KAJI, TOSHITSUGU SUGIMOTO, MASANORI KANATANI,  
MASAMICHI NASU, AND KAZUO CHIHARA

Third Division, Department of Medicine, Kobe University School of Medicine, 7-5-1 Kusunoki-cho,  
Chuo-ku, Kobe 650, Japan

## ABSTRACT

Several lines of evidence have previously indicated that estrogen inhibits PTH-induced bone resorption *in vivo* and *in vitro*. However, its mechanism remains unknown. Therefore, the present study was performed to investigate the effect of estrogen on PTH-stimulated osteoclast-like cell formation and clarify its mechanism.  $17\beta$ -estradiol ( $17\beta$ -E<sub>2</sub>) significantly antagonized osteoclast-like cell formation stimulated by  $10^{-8}$  M human (h) PTH-(1-34) as well as  $10^{-8}$  M hPTH-related peptide (PTHrP)-(1-34) in osteoblast-containing mouse bone cell cultures. The conditioned medium derived from osteoblastic SaOS-2 cells or MC3T3-E1 cells pretreated with both PTH-(1-34) ( $10^{-8}$  M) and  $17\beta$ -E<sub>2</sub> ( $10^{-8}$  M) stimulated osteoclast-like cell formation from hemopoietic blast cells more weakly than conditioned medium from cells pretreated with PTH-(1-34) alone. Moreover,  $10^{-8}$  M  $17\beta$ -E<sub>2</sub> significantly blocked the formation of osteoclast-like cells

stimulated by  $10^{-8}$  M hPTH-(1-34) in spleen cell cultures derived from 5-fluorouracil-pretreated mice. On the other hand,  $10^{-8}$  M  $17\beta$ -E<sub>2</sub> significantly inhibited osteoclast-like cell formation stimulated by dbcAMP ( $10^{-4}$  M) and Sp-cAMPS ( $10^{-4}$  M), as well as forskolin ( $10^{-5}$  M) in mouse bone cell cultures. In contrast,  $10^{-8}$  M  $17\beta$ -E<sub>2</sub> did not affect PMA ( $10^{-7}$  M)-, A23187 ( $10^{-7}$  M)-, or BAYK-8644 ( $5 \times 10^{-6}$  M)-stimulated osteoclast-like cell formation. In conclusion, the present study demonstrated that estrogen inhibits PTH-stimulated osteoclast-like cell formation by directly acting on hemopoietic blast cells as well as by indirectly acting on them via osteoblasts. The inhibitory effects of estrogen on PTH-stimulated osteoclast-like cell formation seemed to be mediated through blocking the cAMP-dependent protein kinase pathway but not by blocking calcium/protein kinase C. (*Endocrinology* **137**: 2217-2224, 1996)

PTH POSSESSES anabolic as well as catabolic actions in bone. A previous study (1) indicated that the intermittent administration of PTH to rats causes an increase in bone volume and stimulates bone formation, although the continuous administration of PTH increases bone resorption and causes osteopenia. Moreover, cortical bone thickness was reduced in patients with hyperparathyroidism, but cancellous bone volumes were often higher in patients with mild hyperparathyroidism than in control patients (2, 3). Thus, the action of PTH in bone seems to be complex, and its mechanism remains unknown.

Estrogen replacement therapy effectively prevents postmenopausal osteoporosis, and several reports have suggested that estrogen is effective in controlling serum calcium and osteopenia in postmenopausal women with primary hyperparathyroidism, possibly by inhibiting PTH-induced bone resorption (4, 5). Estrogen modulates the balance between bone formation and bone resorption by stimulating the bone-forming activity of osteoblasts (6, 7) as well as by reducing osteoclast-mediated bone resorption (8-10). Previ-

ous reports have shown that estrogen inhibits PTH-induced bone resorption in mouse organ cultures (11, 12). There has been accumulating evidence suggesting a direct effect of estrogen on mature osteoclasts (8, 10). These studies demonstrated the existence of functional estrogen receptors in human or avian mature osteoclasts. PTH is considered to stimulate bone resorption by accelerating the development of new osteoclast as well as the activation of quiescent osteoclasts (13, 14). However, the action of estrogen on PTH-induced osteoclast formation and its mechanism are still unknown.

We previously reported that the amino- and carboxyl-termini of PTH stimulate osteoclast-like cell formation by directly acting on hemopoietic blast cells as well as by indirectly acting on them via osteoblasts (13, 15, 16). On the other hand, our recent studies (15, 17) suggested that carboxyl-terminal PTH-related protein (PTHrP) and retinoic acid directly act on hemopoietic blast cells and that prostaglandin E<sub>2</sub> (PGE<sub>2</sub>) indirectly acts on them via osteoblasts (18). However, whether estrogen would directly act on hemopoietic blast cells and/or indirectly act on them via osteoblasts in its effect on PTH-induced osteoclast formation also remains unknown.

PTH acts on bone and kidney through cAMP-dependent protein kinase (PKA) and phospholipase C-coupled calcium/protein kinase C (Ca<sup>2+</sup>/PKC) pathways (19). Previous reports have demonstrated that estrogen significantly inhib-

Received November 28, 1995.

Address all correspondence and requests for reprints to: Toshitsugu Sugimoto M.D., Third Division, Department of Medicine, Kobe University School of Medicine, 7-5-1 Kusunoki-cho, Chuo-ku, Kobe 650, Japan.

\* This work was supported in part by grants from SRF and Yamanouchi Foundation for Research on Metabolic Disorders in Japan.

ited PTH-induced cAMP production in osteoblast-like cells (20, 21). These findings led us to postulate the hypothesis that estrogen selectively affects either the PKA or  $\text{Ca}^{2+}$ /PKC pathway in its action on PTH-induced osteoclast-like cell formation. The present study aims to clarify the mechanism by which estrogen affects PTH-stimulated osteoclast-like cell formation.

## Materials and Methods

### Materials

BDF<sub>1</sub> mice were obtained from the Shizuoka Experimental Animal Center (Shizuoka, Japan) and ICR mice from Japan Clea Co. (Tokyo, Japan).  $17\beta$ -estradiol ( $17\beta$ -E<sub>2</sub>),  $17\alpha$ -E<sub>2</sub>, forskolin, dibutyryl adenosine cAMP (dbcAMP), PGE<sub>2</sub>, phorbol 12-myristate 13-acetate (PMA), and tamoxifen were purchased from Sigma Chemical Co. (St. Louis, MO), hPTH-(1–34) from Peptide Institute (Osaka, Japan), hPTHrP-(1–34) from Peninsula Laboratories (Belmont, CA), hPTHrP-(107–111) from Bachem (Torrance, CA), Sp-cAMPS and Rp-cAMPS from Biolog Life Science Institute (Bremen, Germany), H-7 from Seikagaku Kogyo (Tokyo, Japan), A23187 from Hoechst Japan (Tokyo, Japan) and BayK-8644 from Biomolecular Research Laboratories (Plymouth Meeting, PA). 1, 25-dihydroxyvitamin D<sub>3</sub> [ $1,25$ -(OH)<sub>2</sub>D<sub>3</sub>], human recombinant interleukin (IL)-6 and rat antimouse IL-6 monoclonal antibody were provided by Chugai Pharmaceutical Co. Ltd. (Shizuoka, Japan). hPTH-(35–84) was a kind gift from Peptide Institute (Osaka, Japan). Five-fluorouracil (5-FU) was generously provided from Kyowa Hakko Co. (Osaka, Japan). Murine recombinant IL-3, human recombinant granulocyte-macrophage colony-stimulating factor (GM-CSF), and human recombinant interleukin 1 $\beta$  (IL-1 $\beta$ ) were purchased from Genzyme Co. (Cambridge, MA). Tumor necrosis factor- $\alpha$  (TNF- $\alpha$ ) was generously provided by Asahi Chem. Co. (Shizuoka, Japan). All other chemicals used were of analytical grade.

### Mouse bone cell culture and osteoclast-like cell formation

Osteoclast-like cell formation from mouse unfractionated bone cells was measured, as previously described (22, 23). Femora and tibiae of 10- to 15-day-old ICR mice were aseptically removed. The bones from ten mice were dissected free of soft tissues and mechanically minced with a scalpel blade in phenol red-free MEM containing 5% charcoal-treated FCS. After removal of bone fragments by sedimentation under normal gravity, unfractionated bone cell suspensions were collected from the supernatant. These unfractionated bone cells included tartrate-resistant acid phosphatase (TRAP)-positive multinucleated cells (MNCs), alkaline phosphatase-positive mononuclear cells (probably osteoblasts), and other bone marrow cells. For cell spotting, the number of TRAP-positive cells containing three or more nuclei was counted as TRAP-positive MNCs in these bone cell suspensions. To examine the effect of each chemical on osteoclast-like cell formation using a population of preexistent osteoclast-free bone cells in the presence of osteoblasts, we spotted these mouse bone cells in 96-well plates at 160 TRAP-positive MNCs/well ( $1 \times 10^5$  cells/well). Unfractionated bone cells were cultured in MEM containing 5% FCS at 37 C in a humidified 10% CO<sub>2</sub>-90% air atmosphere for 5 days, by which time preexistent osteoclasts (mature osteoclasts existing at the beginning of culture) had degenerated and few TRAP-positive MNCs were observed after 5 days of culture, as previously described in detail (22, 23). Thus, we could test the effects of osteotropic factors on the sequential process leading to osteoclast formation by adding those factors to the cultures after degeneration of preexistent osteoclasts. That is, this method allows us to analyze osteoclast-like cell formation in the presence of osteoblasts. Each chemical was added to these osteoclast-free bone cell cultures. After 7 days of culture, cells adherent to the plates were washed with PBS, dried, and promptly stained for TRAP. Cells were viewed under an inverted phase-contrast microscope, and the number of TRAP-positive MNCs was counted. These newly formed TRAP-positive MNCs had various characteristics of osteoclasts, including responsiveness to calcitonin and bone-resorbing activity, as previously described (24).

### Formation of osteoclast-like cells from hemopoietic blast cells derived from mouse spleen cells

Osteoclast-like cell formation from hemopoietic blast cells was measured according to the method of Kurihara *et al.* (25). We previously showed that stromal cells and osteoblasts were not present in this culture system (26). Five-FU was administered to 6-week-old female BDF<sub>1</sub> mice at a dose of 150 mg/kg BW through the tail vein. Four days after injection, spleen cells were harvested from three to five mice, and cell suspensions were prepared by the filtration of the homogenate through nylon mesh. Aliquots of the suspension ( $2.6 \times 10^6$  spleen cells/ml) were plated into 35-mm culture dishes (Falcon, Oxnard, CA) containing 1 ml MEM supplemented with 1.2% methylcellulose, 50 U/ml IL-3,  $10^{-8}$  M IL-6, 10 mg/ml BSA (Sigma Chemical Co., St. Louis, MO), and 30% FCS. The colonies of hemopoietic blast cells, which were TRAP-negative, appeared after approximately 7 days and were lifted from the dish with a 10- $\mu$ l Eppendorf micropipette. For preparation of osteoclast precursors, aliquots of a suspension of hemopoietic blast cells ( $10^4$  cells/ml) were cultured in 96-well microplates containing 100  $\mu$ l MEM supplemented with 5% FCS and 200 U/ml GM-CSF for 7 days. Few TRAP-positive MNCs were viewed at this time. Each substance or conditioned medium was then added to this medium, followed by 4 more days of culture, and cells adherent to the plates were washed with PBS, dried, and promptly stained for TRAP. TRAP-positive cells containing three or more nuclei were counted as TRAP-positive MNCs. Stromal cells are not included in spleen cell preparations because spleen cells are supposed not to include stromal cells. Moreover, only hemopoietic cells and not stromal cells have the ability to form a colony. These MNCs had various characteristics of osteoclasts, including responsiveness to calcitonin, calcitonin binding, and osteoclastic bone resorption as evidenced by coculturing with bone rudiments (25). However, bone-resorbing activity of these cells could be demonstrated only in cultures containing stromal cells. Namely, our study revealed that TRAP-positive MNC formed by PTH in mouse spleen cell cultures did not form pits on dentine slice but that these cells could obtain the ability to form pits in coculture with MC3T3-G2/PA-6 stromal cells. These phenomena suggest that the terminal differentiation of osteoclasts requires the presence of stromal cells, as has been reported (27). Moreover, these TRAP-positive MNCs were observed in each colony derived from each replated blast cell, indicating that these hemopoietic blast cells would be precursors for osteoclasts. This method allowed us to analyze osteoclast-like cell formation in the absence of osteoblasts; that is, osteoclast-like cells in this culture system are formed without the help of nonhemopoietic cells including osteoblasts.

### Preparation of conditioned medium (CM) derived from osteoblasts

For the preparation of CM from osteoblasts, human osteoblastic SaOS-2 cells or mouse osteoblastic MC3T3-E1 cells were cultured in 24-well plates, as previously described (15, 16). After treatment of SaOS-2 and MC3T3-E1 cells with each chemical for 24 h with or without 24 h pretreatment with  $17\beta$ -E<sub>2</sub>, these cells were washed several times with serum-free, phenol red-free DMEM or MEM, respectively. Then, 300  $\mu$ l serum-free medium were added to each well. The resulting CM was collected 24 h later.

### Statistical analysis

Statistical analysis was performed by Student's *t* test or Duncan's multiple range test. Results of figures are representative of at least three separate cell preparations. Similar results were obtained from other cell preparations.

## Results

### Effect of $17\beta$ -E<sub>2</sub> on PTH-stimulated osteoclast-like cell formation in mouse bone cell cultures

We examined the effects of  $17\beta$ -E<sub>2</sub> on PTH-stimulated osteoclast-like cell formation by employing mouse bone cell

cultures. As shown in Fig. 1,  $17\beta$ -E<sub>2</sub> significantly inhibited the formation of MNCs stimulated by  $10^{-8}$  M hPTH-(1-34) at a minimal effective concentration of  $10^{-9}$  M.  $10^{-8}$  M  $17\beta$ -E<sub>2</sub> similarly caused an inhibition of MNC formation stimulated by  $10^{-8}$  M hPTHrP-(1-34), whereas it did not affect MNC formation stimulated by  $10^{-8}$  M 1,25-(OH)<sub>2</sub>D<sub>3</sub>. On the other hand,  $17\alpha$ -E<sub>2</sub>, a much less active stereoisomer of  $17\beta$ -E<sub>2</sub>, did not affect PTH-(1-34)-stimulated MNC formation.

*Effect of  $17\beta$ -E<sub>2</sub> on osteoclast-like cell formation stimulated by other bone-resorbing factors in mouse bone cell cultures*

As shown in Fig. 2, 40 U/ml IL-1 $\beta$ ,  $10^{-8}$  M TNF- $\alpha$ , and  $10^{-6}$  M PGE<sub>2</sub> significantly stimulated MNC formation in mouse bone cell cultures. Moreover,  $10^{-8}$  M hPTH-(35-84) and  $10^{-8}$  M hPTHrP-(107-111) also significantly stimulated MNC formation in these cultures, as we previously reported (13, 15). However,  $10^{-8}$  M  $17\beta$ -E<sub>2</sub> did not affect MNC formation stimulated by these bone-resorbing factors.

*Effect of  $17\beta$ -E<sub>2</sub> on PTH-stimulated osteoclast-like cell formation from hemopoietic blast cells via osteoblastic cells*

Our previous study indicated that PTH stimulates osteoclast-like cell formation through some soluble factors from osteoblasts (16). We therefore examined whether estrogen would affect the production of soluble factors from osteoblasts pretreated with PTH. As shown in Fig. 3, CM derived from SaOS-2 cells or MC3T3-E1 cells pretreated with hPTH-(1-34) ( $10^{-8}$  M) significantly increased the formation of TRAP-positive MNCs from hemopoietic blast cells. MNC formation by CM from cells pretreated with both PTH-(1-34) ( $10^{-8}$  M) and  $17\beta$ -E<sub>2</sub> ( $10^{-8}$  M) was significantly reduced as

compared with MNC formation by CM pretreated with PTH-(1-34) alone. These data suggested that estrogen blocks PTH-stimulated osteoclast-like cell formation partly through modulating the release of some soluble factors from osteoblasts.

*Effect of  $17\beta$ -E<sub>2</sub> on PTH-stimulated osteoclast-like cell formation from hemopoietic blast cells in the absence of osteoblasts*

As we previously reported (26), PTH directly acts on hemopoietic blast cells derived from spleen cells, resulting in the formation of TRAP-positive MNCs possessing calcitonin-binding sites. We next examined whether  $17\beta$ -E<sub>2</sub> would directly act on hemopoietic blast cells, thereby causing an inhibition of PTH-stimulated osteoclast-like cell formation. As shown in Fig. 4,  $10^{-8}$  M  $17\beta$ -E<sub>2</sub> significantly inhibited the formation of MNCs stimulated by  $10^{-8}$  M hPTH-(1-34) in mouse spleen cell cultures derived from 5-FU-pretreated mice. On the other hand,  $10^{-8}$  M  $17\beta$ -E<sub>2</sub> did not affect MNC formation stimulated by  $10^{-8}$  M 1,25-(OH)<sub>2</sub>D<sub>3</sub>, and  $10^{-8}$  M  $17\alpha$ -E<sub>2</sub> did not affect PTH-(1-34)-stimulated MNC formation.

*Effect of  $17\beta$ -E<sub>2</sub> on osteoclast-like cell formation stimulated by various kinds of second messenger analogues in mouse bone cell cultures*

We examined whether  $17\beta$ -E<sub>2</sub> would affect osteoclast-like cell formation stimulated by various second messenger analogues in osteoblast-containing mouse bone cell cultures. As shown in Fig. 5,  $10^{-5}$  M forskolin, which affect the catalytic subunit of adenylate cyclase, and  $10^{-4}$  M dbcAMP and Sp-cAMPS, both PKA activators, significantly caused a stimu-

FIG. 1. Effect of  $17\beta$ -E<sub>2</sub> on osteoclast-like cell formation stimulated by PTH, PTHrP, or 1,25-(OH)<sub>2</sub>D<sub>3</sub> in mouse bone cell cultures. After degeneration of pre-existent osteoclasts,  $10^{-8}$  M hPTH-(1-34),  $10^{-8}$  M hPTHrP-(1-34), and  $10^{-8}$  M 1,25-(OH)<sub>2</sub>D<sub>3</sub> were added with or without the indicated concentrations of  $17\beta$ -E<sub>2</sub> or  $10^{-8}$  M  $17\alpha$ -E<sub>2</sub>, followed by 7 days of culture. Then, the number of TRAP-positive MNCs was counted, as described in *Materials and Methods*. Data are expressed as the mean  $\pm$  SEM of four determinations. \*,  $P < 0.01$ , compared with control. \*\*,  $P < 0.01$ , compared with PTH-(1-34) or PTHrP-(1-34)-treated,  $17\beta$ -E<sub>2</sub>-untreated group; \*\*\*,  $P < 0.05$ , compared with PTH-(1-34)-treated,  $17\beta$ -E<sub>2</sub>-untreated group.

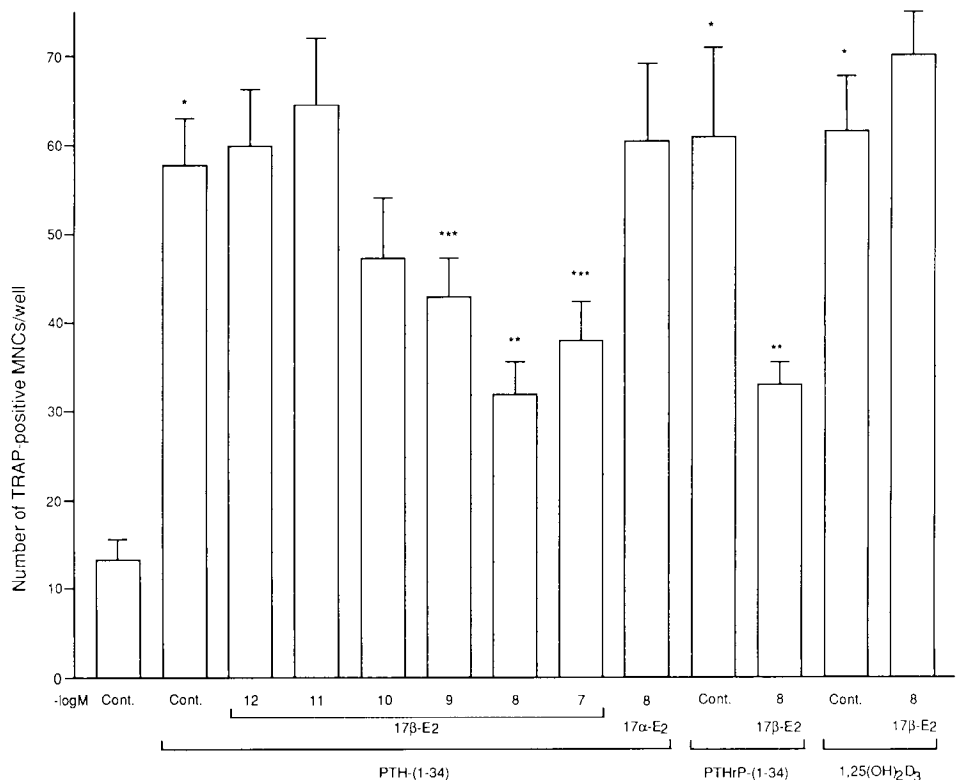

FIG. 2. Effect of  $17\beta\text{-E}_2$  on osteoclast-like cell formation stimulated by other bone-resorbing factors in mouse bone cell cultures. After degeneration of pre-existent osteoclasts, 40 U/l IL- $1\beta$ ,  $10^{-8}$  M TNF- $\alpha$ ,  $10^{-6}$  M PGE $_2$ ,  $10^{-8}$  M hPTH-(35-84), or  $10^{-8}$  M hPTHrP-(107-111) were added with or without  $10^{-8}$  M  $17\beta\text{-E}_2$ , followed by 7 days of culture. Then, the number of TRAP-positive MNCs was counted, as described in *Materials and Methods*. Data are expressed as the mean  $\pm$  SEM of four determinations. \*,  $P < 0.01$ , compared with control.

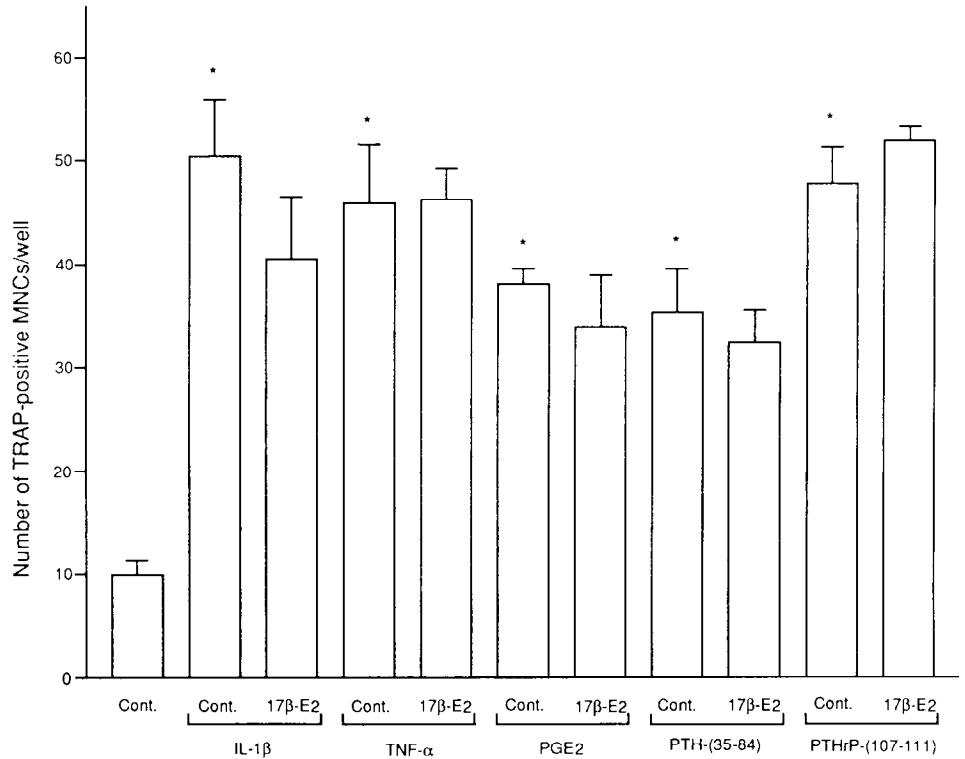

FIG. 3. Effect of  $17\beta\text{-E}_2$  on PTH-stimulated osteoclast-like cell formation from hemopoietic blast cells via osteoblastic cells. Conditioned medium was obtained from SaOS-2 cells (left panel) or MC3T3-E1 cells (right panel) pretreated with  $10^{-8}$  M hPTH-(1-34) for 24 h with or without  $10^{-8}$  M  $17\beta\text{-E}_2$  24 h pretreatment. After treatment of mouse hemopoietic blast cells with 30% of each conditioned medium, the number of TRAP-positive MNCs was counted, as described in *Materials and Methods*. Each bar represents the mean  $\pm$  SEM of four determinations. \*,  $P < 0.01$ , compared with each control medium; \*\*,  $P < 0.01$ , compared with each alone PTH-(1-34)-treated conditioned medium.

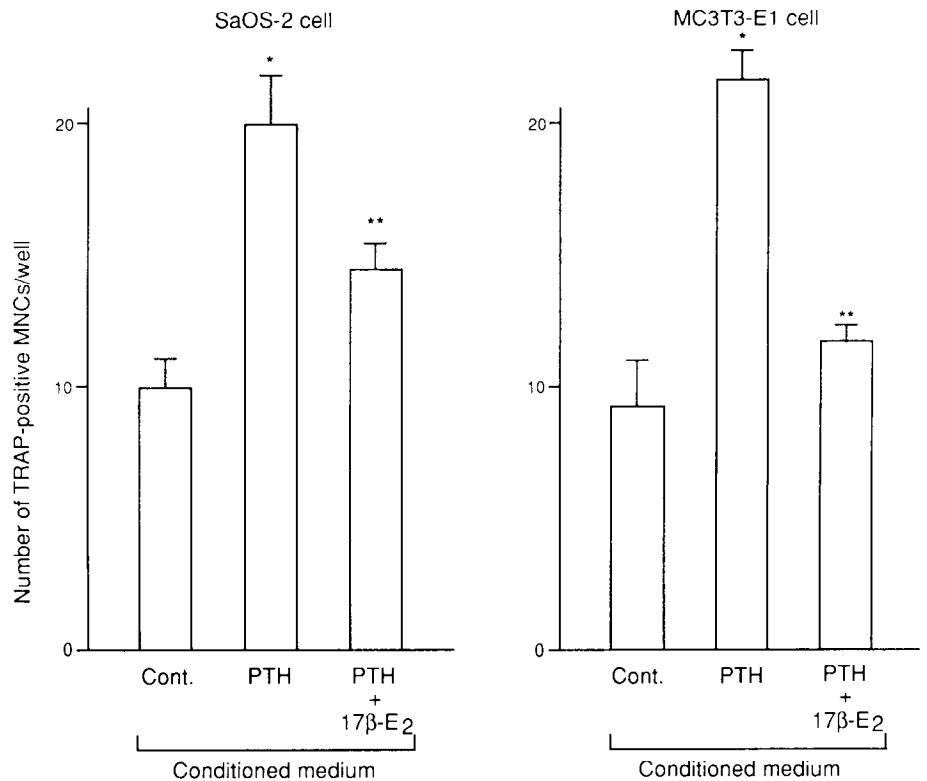

lation of MNC formation in mouse bone cell cultures.  $10^{-8}$  M  $17\beta\text{-E}_2$  significantly inhibited MNC formation stimulated by dbcAMP and Sp-cAMPS as well as by forskolin. Moreover,  $10^{-8}$  M  $17\beta\text{-E}_2$  significantly blocked MNC formation stimulated by  $10^{-7}$  and  $10^{-6}$  M forskolin as well as  $10^{-5}$  M

dbcAMP (number of MNC per well:  $9.0 \pm 0.5$  for the control group,  $18.9 \pm 2.2$  for  $10^{-7}$  M forskolin,  $10.0 \pm 1.0$  for  $10^{-7}$  M forskolin, and  $10^{-8}$  M  $17\beta\text{-E}_2$ ,  $36.3 \pm 4.2$  for  $10^{-6}$  M forskolin,  $22.1 \pm 2.7$  for  $10^{-6}$  M forskolin and  $10^{-8}$  M  $17\beta\text{-E}_2$ ,  $21.0 \pm 3.6$  for  $10^{-5}$  M dbcAMP,  $11.3 \pm 1.0$  for  $10^{-5}$  M dbcAMP, and  $10^{-8}$

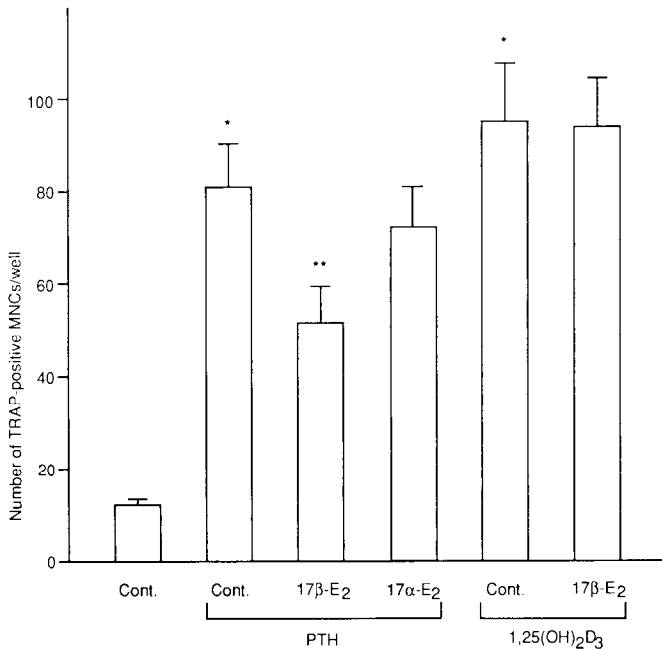

FIG. 4. Effect of  $17\beta$ -E<sub>2</sub> on PTH-stimulated osteoclast-like cell formation from hemopoietic blast cells in the absence of osteoblasts. Mouse hemopoietic blast cells supported by GM-CSF were treated with  $10^{-8}$  M hPTH-(1-34) or  $10^{-8}$  M 1,25-(OH)<sub>2</sub>D<sub>3</sub> with or without  $10^{-8}$  M  $17\beta$ -E<sub>2</sub> or  $10^{-8}$  M  $17\beta$ -E<sub>2</sub> for 4 days. Then, the number of TRAP-positive MNCs was counted, as described in *Materials and Methods*. Each bar represents the mean  $\pm$  SEM of four determinations. \*,  $P < 0.01$ , compared with control, \*\*,  $P < 0.05$ , compared with alone PTH-(1-34)-treated group.

m  $17\beta$ -E<sub>2</sub>).  $10^{-6}$  M tamoxifen, one of antiestrogens, almost completely blocked the inhibitory effects of  $17\beta$ -E<sub>2</sub> on osteoclast-like cell formation stimulated by PTH-(1-34), forskolin, and PKA activators in unfractionated mouse bone cell cultures (data not shown). Therefore, the effects of  $17\beta$ -E<sub>2</sub> seems to be specific. As shown in Fig. 6,  $10^{-7}$  M PMA, a phorbol ester that activates PKC,  $10^{-7}$  M A23187, a calcium ionophore, and  $5 \times 10^{-6}$  M BAYK-8644, an activator of voltage-dependent calcium channels, significantly stimulated MNC formation in these cultures. However,  $10^{-8}$  M  $17\beta$ -E<sub>2</sub> did not affect MNC formation stimulated by PMA, A23187, or BAYK-8644. As shown in Fig. 7,  $17\beta$ -E<sub>2</sub> significantly inhibited MNC formation induced by the combined treatment with  $10^{-8}$  M PTH-(1-34) and  $10 \mu$ M H-7, a PKC inhibitor, whereas it did not affect MNC formation stimulated by the combined treatment with  $10^{-8}$  M PTH-(1-34) and  $10^{-4}$  M Rp-cAMPS, a direct PKA inhibitor. These data suggested that  $17\beta$ -E<sub>2</sub> inhibits PTH-stimulated MNC formation by affecting the PKA pathway, and not by affecting Ca<sup>2+</sup>/PKC.

### Discussion

Several lines of evidence have indicated that estrogen causes an inhibition of PTH-stimulated bone resorption in mouse organ cultures (11, 12). Moreover, the results of Orimo *et al.* (28) suggested that the sensitivity of bone to PTH is increased in the absence of endogenous estrogens. The present study demonstrated that  $17\beta$ -E<sub>2</sub> blocked PTH-stimulated osteoclast-like cell formation in osteoblast-containing

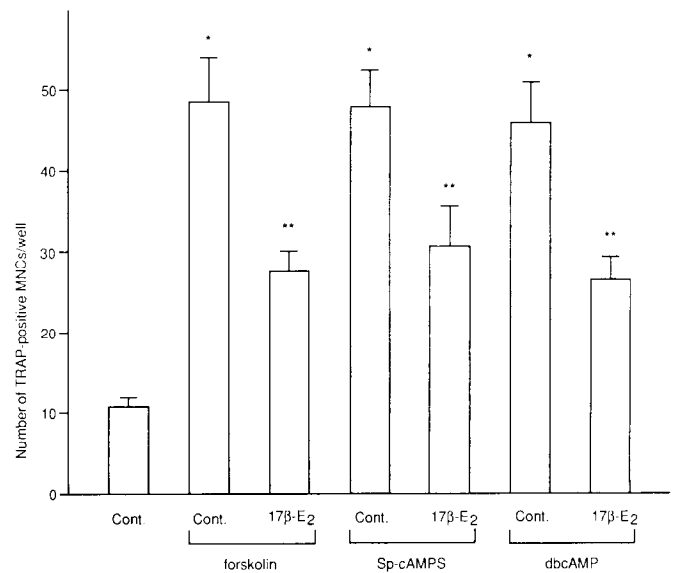

FIG. 5. Effect of  $17\beta$ -E<sub>2</sub> on osteoclast-like cell formation stimulated by forskolin or PKA activators in mouse bone cell cultures. Unfractionated mouse bone cells after degeneration of preexistent osteoclasts were treated with  $10^{-5}$  M forskolin,  $10^{-4}$  M dbcAMP, or Sp-cAMPS with or without  $10^{-8}$  M  $17\beta$ -E<sub>2</sub> for 7 days. Then, the number of TRAP-positive MNCs was counted, as described in *Materials and Methods*. Each bar represents the mean  $\pm$  SEM of four determinations. \*,  $P < 0.01$ , compared with control, \*\*,  $P < 0.01$ , compared with  $17\beta$ -E<sub>2</sub>-untreated group.

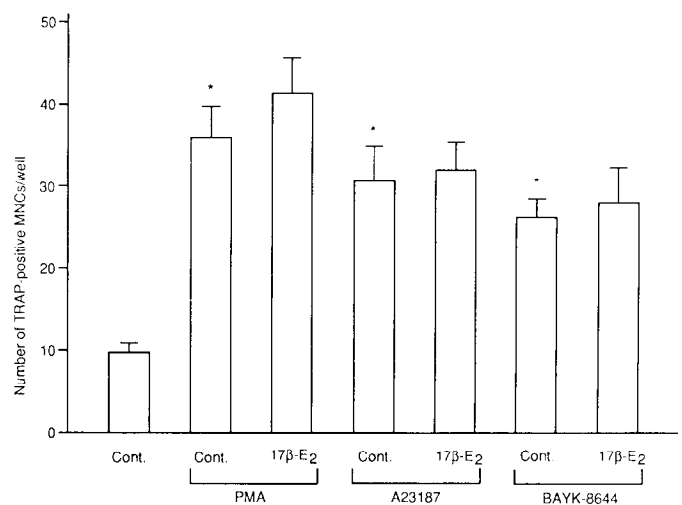

FIG. 6. Effect of  $17\beta$ -E<sub>2</sub> on osteoclast-like cell formation stimulated by PMA, A23187, BAYK-8644, in mouse bone cell cultures. Unfractionated mouse bone cells after degeneration of preexistent osteoclasts were treated with  $10^{-7}$  M PMA,  $10^{-7}$  M A23187 or  $5 \times 10^{-6}$  M BAYK-8644 with or without  $10^{-8}$  M  $17\beta$ -E<sub>2</sub> for 7 days. Then, the number of TRAP-positive MNCs was counted, as described in *Materials and Methods*. Each bar represents the mean  $\pm$  SEM of four determinations. \*,  $P < 0.01$ , compared with control.

mouse bone cell cultures. Because  $17\alpha$ -E<sub>2</sub> did not affect PTH-stimulated osteoclast-like cell formation and  $17\beta$ -E<sub>2</sub> did not affect 1,25-(OH)<sub>2</sub>D<sub>3</sub>-stimulated osteoclast-like cell formation, the inhibition by estrogen of PTH-stimulated osteoclast-like cell formation is unlikely to be nonspecific. The recent cloning of cDNA of the PTH/PTHrP receptor has demonstrated that both PTH-(1-34) and PTHrP-(1-36) are capable of bind-

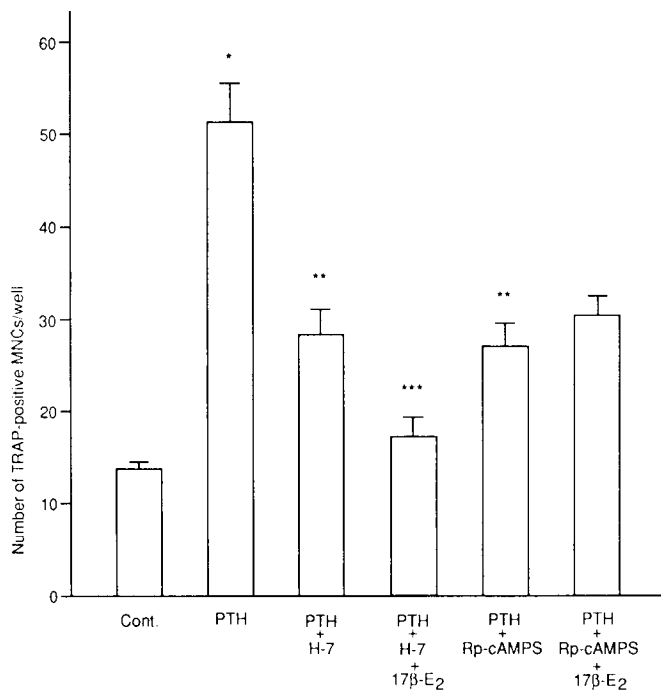

FIG. 7. Effect of  $17\beta\text{-E}_2$  on osteoclast-like cell formation stimulated by PTH-(1-34) and PKA inhibitor or PTH-(1-34) and PKC inhibitor in mouse bone cell cultures. Unfractionated mouse bone cells after degeneration of preexistent osteoclasts were treated with  $10^{-8}$  M PTH-(1-34) and  $10^{-4}$  M Rp-cAMPS or  $10^{-8}$  M PTH-(1-34) and  $10^{-6}$  M H-7 with or without  $10^{-8}$  M  $17\beta\text{-E}_2$  for 7 days. Cells were pretreated with Rp-cAMPS or H-7 for 30 min before PTH-(1-34) or  $17\beta\text{-E}_2$  addition. Then, the number of TRAP-positive MNCs was counted, as described in *Materials and Methods*. Each bar represents the mean  $\pm$  SEM of four determinations. \*,  $P < 0.01$ , compared with control; \*\*,  $P < 0.01$ , compared with alone PTH-(1-34)-treated group; \*\*\*,  $P < 0.05$ , compared with PTH-(1-34)- and H-7-treated,  $17\beta\text{-E}_2$ -untreated group.

ing to the same receptor (29). Moreover, our previous studies (26, 30) indicated that PTHrP-(1-34) stimulated osteoclast-like cell formation as well as bone-resorbing activity through the same receptor-mediated mechanisms as PTH-(1-34). The present study revealed that  $17\beta\text{-E}_2$  inhibited PTHrP-(1-34)- and PTH-(1-34)-stimulated osteoclast-like cell formation to a similar extent. These findings indicated that estrogen inhibits the PTH/PTHrP receptor-mediated stimulation of osteoclast-like cell formation in mouse bone cell cultures. IL-1 $\beta$ , TNF- $\alpha$ , and PGE $_2$  play important roles as the local bone-resorbing factors in various metabolic bone diseases. Our recent study demonstrated that carboxyl-terminal peptides from PTH and PTHrP stimulate osteoclast-like cell formation, possibly through a mechanism that is different from the mechanism of amino-terminal peptides in mouse bone cell cultures (13, 15). Therefore, we investigated whether estrogen would affect osteoclast-like cell formation stimulated by these osteotropic factors in mouse bone cell cultures. The present study revealed that  $17\beta\text{-E}_2$  did not affect osteoclast-like cell formation stimulated by these osteotropic factors in mouse bone cell cultures. The previous study (31) revealed that *ex vivo* bone marrow cultures from ovariectomized mice exhibit increased osteoclast formation in the presence of  $1,25\text{-(OH)}_2\text{D}_3$ . This discrepancy may be partly due to the differ-

ence of culture systems. In that study, IL-6 mediates increased osteoclast development after estrogen loss. However, our previous study revealed that IL-6 did not stimulate osteoclast-like cell formation in unfractionated mouse bone cell cultures (24). Thus, there is the difference of response to IL-6 between these culture systems. Although it is well known that IL-6 plays an important role in the early stages of osteoclastogenesis and hematopoiesis, the role of IL-6 in the differentiation and fusion of osteoclast precursor cells still remains unclear. The culture system employed in the present study allow us to evaluate the effect of cytokines on the late stages of osteoclast differentiation. Therefore, we cannot rule out the possibility that estrogen inhibits osteoclast-like cell formation stimulated by the factors such as  $1,25\text{-(OH)}_2\text{D}_3$ , when earlier stage of osteoclast precursors was employed. The recent study (32) revealed that IL-6 is downstream effector of PTH, resulting in the stimulation of bone resorption. However, our previous study revealed that IL-6 did not stimulate osteoclast-like cell formation in unfractionated mouse bone cell cultures (24), and our preliminary study revealed that antimouse IL-6 antibody did not affect PTH- and  $1,25\text{-(OH)}_2\text{D}_3$ -stimulated osteoclast-like cell formation in these cultures (data not shown). Therefore, it seems unlikely that IL-6 is a mediator of PTH-stimulated osteoclast-like cell formation in these cultures.

PTH stimulates bone resorption through some soluble factors released from osteoblasts (33). In our recent study (16), conditioned medium from osteoblasts pretreated with PTH-(1-34) stimulated osteoclast-like cell formation from hemopoietic blast cells derived from mouse spleen cells, indicating that PTH stimulates osteoclast-like cell formation via some soluble factors released from osteoblasts. Because osteoblasts possess functional estrogen receptors and estrogen directly stimulates osteoblast proliferation and differentiation (6, 7), the inhibition by estrogen of PTH-stimulated osteoclast-like cell formation might be mediated through osteoblasts. In the present study, the CM derived from SaOS-2 and MC3T3-E1 cells pretreated with both PTH-(1-34) and  $17\beta\text{-E}_2$  was a less potent stimulator of osteoclast-like cell formation than the CM from cells pretreated with PTH-(1-34) alone. Thus, estrogen appears to inhibit PTH-stimulated osteoclast-like cell formation partly by modulating the release of some soluble factors from osteoblasts through directly acting on these cells.

Hakeda *et al.* (14) and we (26) previously reported that hPTH-(1-34) stimulated osteoclast-like cell formation from mouse hemopoietic blast cells that possess binding sites for this peptide. Fiorelli *et al.* (34) recently reported that functional estrogen receptors are present in the human preosteoclastic cell line FLG29.1, and that estrogen significantly reduced cell proliferation (34). Moreover, Hong *et al.* (9) revealed that mouse osteoclast precursors possess estrogen-binding sites, and that estrogen inhibits the proliferation and maturation of osteoclast precursors (31). The present study revealed that  $17\beta\text{-E}_2$  significantly inhibited PTH-stimulated osteoclast-like cell formation from hemopoietic blast cells derived from mouse spleen cells pretreated with 5-FU. Because  $17\alpha\text{-E}_2$  did not affect PTH-stimulated osteoclast-like cell formation and  $17\beta\text{-E}_2$  did not affect  $1,25\text{-(OH)}_2\text{D}_3$ -stimulated osteoclast-like cell formation, the inhibition by estro-

gen of PTH-stimulated osteoclast-like cell formation is likely to be specific. The present findings, therefore, suggested that estrogen inhibits PTH-stimulated osteoclast-like cell formation by directly acting on hemopoietic blast cells.

The cloning of complementary DNA of the PTH/PTHrP receptor revealed that a single cDNA clone, expressing either the rat bone or opossum kidney PTH receptor, mediates the stimulation by PTH of both adenylate cyclase and phospholipase C, when expressed in COS cells (19). It has been reported that osteoblasts possess PTH-responsive dual signal transduction systems (PKA and  $\text{Ca}^{2+}$ /PKC systems) (19, 35). Moreover, we reported that the activations of PKA and PKC are directly linked to PTH-stimulated osteoclast-like cell formation from hemopoietic blast cells (26). That report (26) and our earlier study (15) indicated that an increase in  $[\text{Ca}^{2+}]_i$  might be involved in the stimulation of osteoclast-like cell formation by PTH. The present study revealed that  $17\beta\text{-E}_2$  significantly inhibited osteoclast-like cell formation stimulated by PKA activators and forskolin in mouse bone cell cultures, whereas it did not affect osteoclast like cell formation stimulated by a PKC activator, a calcium ionophore, and a calcium channel activator. Moreover,  $17\beta\text{-E}_2$  significantly blocked osteoclast-like cell formation stimulated by the combined treatment with PTH and a PKC inhibitor, but not by the combined treatment with PTH and a PKA inhibitor. These findings suggest that estrogen inhibits PTH-stimulated osteoclast-like cell formation through blocking the PKA pathway but not by blocking  $\text{Ca}^{2+}$ /PKC.

PTH accelerates both bone formation and bone resorption, and its potent bone-forming activity is the reason why PTH is employed as a drug to increase bone volume in osteoporotic patients (36). On the other hand, PTH causes osteopenia by stimulating bone resorption. Thus, PTH possesses complex dual actions in bone, although these mechanisms are unclear. The present study demonstrated that estrogen specifically inhibited PTH-stimulated osteoclast-like cell formation in mouse bone cell cultures. Moreover, Shen *et al.* (37) reported that a combination of estrogen and PTH was significantly better than either agent alone, both in terms of bone mass and trabecular structure in ovariectomized rats. These findings led us to speculate on the possibility that estrogen is effective in preventing the adverse effects that occur in the administration of PTH to the osteoporotic patients by inhibiting the bone-resorbing action induced by PTH as well as by its own effects on bone. The effective coadministration of estrogen and PTH may clinically result in more dramatic effects than either agent alone in the treatment of osteoporosis.

In conclusion, the present study demonstrated that estrogen inhibits PTH-stimulated osteoclast-like cell formation by directly acting on hemopoietic blast cells as well as by indirectly acting on them via osteoblasts. The inhibitory effects of estrogen on PTH-stimulated osteoclast-like cell formation seemed to be mediated through blocking PKA pathway but not by blocking  $\text{Ca}^{2+}$ /PKC.

## References

1. Tam CS, Heersche JNM, Murray TM, Parsons JA 1982 Parathyroid hormone stimulates the bone apposition rate independently of its

- resorptive action: differential effects of intermittent and continuous administration. *Endocrinology* 110:506–512
2. Kleerekoper M, Villaneuva AR, Mathews CHE 1983 PTH mediated bone loss in primary, secondary hyperparathyroidism. In: Frame B, Potts JT (eds) *Clinical Disorders of Bone and Mineral Metabolism*. Excerpta Medica, Amsterdam, pp 200–203
3. Silverberg SJ, Shane E, Cruz LDL, Dempster DW, Feldman F, Seldin D, Jacobs TP, Siris ES, Cafferty M, Parisien MV, Lindsay R, Clemens TL, Bilezikian JP 1989 Skeletal disease in primary hyperparathyroidism. *J Bone Miner Res* 4:283–291
4. Gallsgher JC, Nordin BEC 1972 Treatment with oestrogens of primary hyperparathyroidism in post-menopausal women. *Lancet* 1:503–5072
5. Marcus R, Madvig P, Crim M, Pont A, Kosek J 1984 Conjugated estrogens in the treatment of postmenopausal women with hyperparathyroidism. *Ann Intern Med* 100:633–640
6. Eriksen EF, Colvard DS, Berg NJ, Graham ML, Mann KG, Spelsberg TC, Riggs BL 1988 Evidence of estrogen receptors in normal human osteoblast-like cells. *Science* 241:84–86
7. Komm BS, Terpening CM, Benz DJ, Graeme KA, Gallegos A, Kork M, Greene GL, O'Malley BW, Hausler MR 1988 Estrogen binding, receptor mRNA, and biologic response in osteoblast-like osteosarcoma cells. *Science* 241:81–83
8. Oursler MJ, Osdoby P, Pyfferoen J, Riggs BL, Spelsberg TC 1991 Avian osteoclasts as estrogen target cells. *Proc Natl Acad Sci USA* 88:6613–6617
9. Hong MH, Williams H, Jin CH, Pike JW 1994  $17\beta$ -estradiol suppresses mouse osteoclast differentiation and function *in vitro* via the estrogen receptor. *J Bone Miner Res [Suppl]* 9:S161 (Abstract)
10. Oursler MJ, Pederson L, Fitzpatrick L, Riggs L, Spelsberg T 1994 Human giant cell tumors of the bone (osteoblastomas) are estrogen target cells. *Proc Natl Acad Sci USA* 91:5227–5231
11. Atkins D, Zanelli JM, Peacock M, Nordin BEC 1972 The effect of oestrogens on the response of bone to parathyroid hormone *in vitro*. *J Endocrinol* 54:107–117
12. Pilbeam CC, Klein-nulend J, Raisz LG 1989 Inhibition by  $17\beta$ -estradiol of PTH stimulated resorption and prostaglandin production in cultured neonatal mouse calvariae. *Biochem Biophys Res Commun* 163:1319–1324
13. Kaji H, Sugimoto T, Kanatani M, Miyauchi A, Kimura T, Sakakibara S, Fukase M, Chihara K 1994 Carboxyl-terminal parathyroid hormone fragments stimulate osteoclast-like cell formation and osteoclastic activity. *Endocrinology* 134:1897–1904
14. Hakeda Y, Hiura K, Sato T, Okazaki R, Matsumoto T, Ogata E, Ishitani R, Kumegawa M 1989 Existence of parathyroid hormone binding sites on murine hemopoietic blast cells. *Biochem Biophys Res Commun* 163:1481–1486
15. Kaji H, Sugimoto T, Kanatani M, Fukase M, Chihara K 1995 Carboxyl-terminal peptides from parathyroid hormone-related protein stimulate osteoclast-like cell formation. *Endocrinology* 136:842–848
16. Kaji H, Sugimoto T, Kanatani M, Fukase M, Chihara K 1993 Involvement of dual signal transduction systems in the stimulation of osteoclast-like cell formation by parathyroid hormone and parathyroid hormone-related peptide. *Biochem Biophys Res Commun* 194:157–162
17. Kaji H, Sugimoto T, Kanatani M, Fukase M, Kumegawa M, Chihara K 1995 Retinoic acid induces osteoclast-like cell formation by directly acting on hemopoietic blast cells and stimulates osteopontin mRNA expression in isolated osteoclasts. *Life Sci* 56:1903–1913
18. Kaji H, Sugimoto T, Kanatani M, Fukase M, Kumegawa M, Chihara K 1996 Prostaglandin  $\text{E}_2$  stimulates osteoclast-like cell formation and bone-resorbing activity via osteoblasts: role of cAMP-dependent protein kinase. *J Bone Miner Res* 11:62–71
19. Abou-Samra AB, Juppner H, Force T, Freeman MW, Kong XF, Schipani E, Urena P, Richards J, Bonventre JV, Potts JT Jr, Kronenberg HM, Segre GV 1992 Expression cloning of a common receptor for parathyroid hormone and parathyroid hormone-related peptide from rat osteoblast-like cells: a single receptor stimulates intracellular accumulation of both cAMP and inositol triphosphates and increases intracellular free calcium. *Proc Natl Acad Sci USA* 89:2732–2736
20. Ernst M, Heath JK, Rodan GA 1989 Estradiol effects on proliferation, messenger ribonucleic acid for collagen and insulin-like growth

- factor-I, and parathyroid hormone-stimulated adenylate cyclase activity in osteoblastic cells from calvariae and long bones. *Endocrinology* 125:825–833
21. **Fukayama S, Tashjian AH Jr** 1989 Direct modulation by estradiol of the response of human bone cells (SaOS-2) to human parathyroid hormone (PTH) and PTH-related protein. *Endocrinology* 124:397–401
  22. **Takada Y, Kusuda M, Hiura K, Sato T, Mochizuki H, Nagao Y, Tomura M, Yahiro M, Hakeda Y, Kawashima H, Kumegawa M** 1992 A simple method to assess osteoclast-mediated bone resorption using unfractionated bone cells. *Bone Miner* 17:347–359
  23. **Mochizuki H, Hakeda Y, Wakatsuki N, Usui N, Akashi S, Sato T, Tanaka K, Kumegawa M** 1992 Insulin-like growth factor-I supports formation and activation of osteoclasts. *Endocrinology* 131:1075–1080
  24. **Kanatani M, Sugimoto T, Fukase M, Chihara K** 1994 Role of interleukin-6 and prostaglandins in the effect of monocyte-conditioned medium on osteoclast formation. *Am J Physiol* 267:E868–E876
  25. **Kurihara N, Suda T, Miura Y, Nakauchi H, Kodama H, Hiura K, Hakeda Y, Kumegawa M** 1989 Generation of osteoclasts from isolated hematopoietic progenitor cells. *Blood* 74:1295–1302
  26. **Sugimoto T, Kanatani M, Kaji H, Yamaguchi T, Fukase M, Chihara K** 1993 Second messenger signaling of PTH- and PTH-related peptide-stimulated osteoclast-like cell formation from mouse hemopoietic blast cells: role of cAMP-dependent protein kinase and protein kinase C. *Am J Physiol* 265:E367–E373
  27. **Udagawa N, Takahashi N, Akatsu T, Tanaka H, Sasaki T, Nishihara T, Koga T, Martin TJ, Suda T** 1990 Origin of osteoclasts: mature monocytes and macrophages are capable of differentiating into osteoclasts under a suitable microenvironment prepared by bone marrow-derived stromal cells. *Proc Natl Acad Sci USA* 87:7260–7264
  28. **Orimo H, Fujita T, Yoshikawa M** 1972 Increased sensitivity of bone to parathyroid hormone in ovariectomized rats. *Endocrinology* 90:760–763
  29. **Juppner H, Abou-Samra AB, Freeman MW, Kong XF, Schipani E, Richards J, Kolakowski LF Jr, Hock J, Potts Jr JT, Kronenberg HM, Segre GV** 1991 A G protein-linked receptor for parathyroid hormone and parathyroid hormone-related peptide. *Science* 254:1024–1026
  30. **Kaji H, Sugimoto T, Fukase M, Chihara K** 1993 Role of dual signal transduction systems in the stimulation of bone resorption by parathyroid hormone-related peptide: the direct involvement of cAMP-dependent protein kinase. *Horm Metab Res* 25:421–424
  31. **Jilka RL, Hangoc G, Girasole G, Passeri G, Williams DC, Abrams JS, Boyce B, Broxmeyer H, Manolagas SC** 1992 Increased osteoclast development after estrogen loss: mediation by interleukin-6. *Science* 257:88–91
  32. **Greenfield EM, Shaw SM, Gornik SA, Banks MA** 1995 Adenylate cyclase and interleukin 6 are downstream of parathyroid hormone resulting in stimulation of bone resorption. *J Clin Invest* 96:1238–1244
  33. **McSheehy PMJ, Chambers TJ** 1986 Osteoblast-like cells in the presence of parathyroid hormone release soluble factor that stimulates osteoclastic bone resorption. *Endocrinology* 119:1654–1659
  34. **Fiorelli G, Gori F, Petilli M, Tanini A, Benvenuti S, Serio M, Bernabei P, Brandi ML** 1995 Functional estrogen receptors in a human preosteoclastic cell line. *Proc Natl Acad Sci USA* 92:2672–2676
  35. **Civitelli R, Reid IR, Westbrook S, Avioli LV, Hruska KA** 1987 PTH elevates inositol polyphosphates and diacylglycerol in a rat osteoblast-like cell line. *Am J Physiol* 255:E660–E667
  36. **Reeve J, Hesp R, Williams D, Hulme P, Klenerman L, Zanelli JM, Darby AJ, Tregear GW, Parsons JA** 1976 Anabolic effect of low doses of a fragment of human parathyroid hormone on the skeleton in postmenopausal osteoporosis. *Lancet* 1:1035–1038
  37. **Shen V, Dempster DW, Birchman R, Xu R, Lindsay R** 1993 Loss of cancellous bone mass and connectivity in ovariectomized rats can be restored by combined treatment with parathyroid hormone and estradiol. *J Clin Invest* 91:2479–2487
